# Supplementary material for: Maternal Dietary Choline Status Influences Brain Gray and White Matter Development in Young Pigs
Source: PubMed Central journal article supplement — Curr Dev Nutr. 2018 Mar 21;2(6):nzy015. doi: 10.1093/cdn/nzy015 (PMC6007439; doi:10.1093/cdn/nzy015), 2018-03-21
Supplement: nzy015_supplemental_figure_1.pdf [file nzy015_supplemental_figure_1.pdf]

**Supplemental Figure 1.** Tract-based spatial statistics mean fractional anisotropy skeleton used for data comparisons

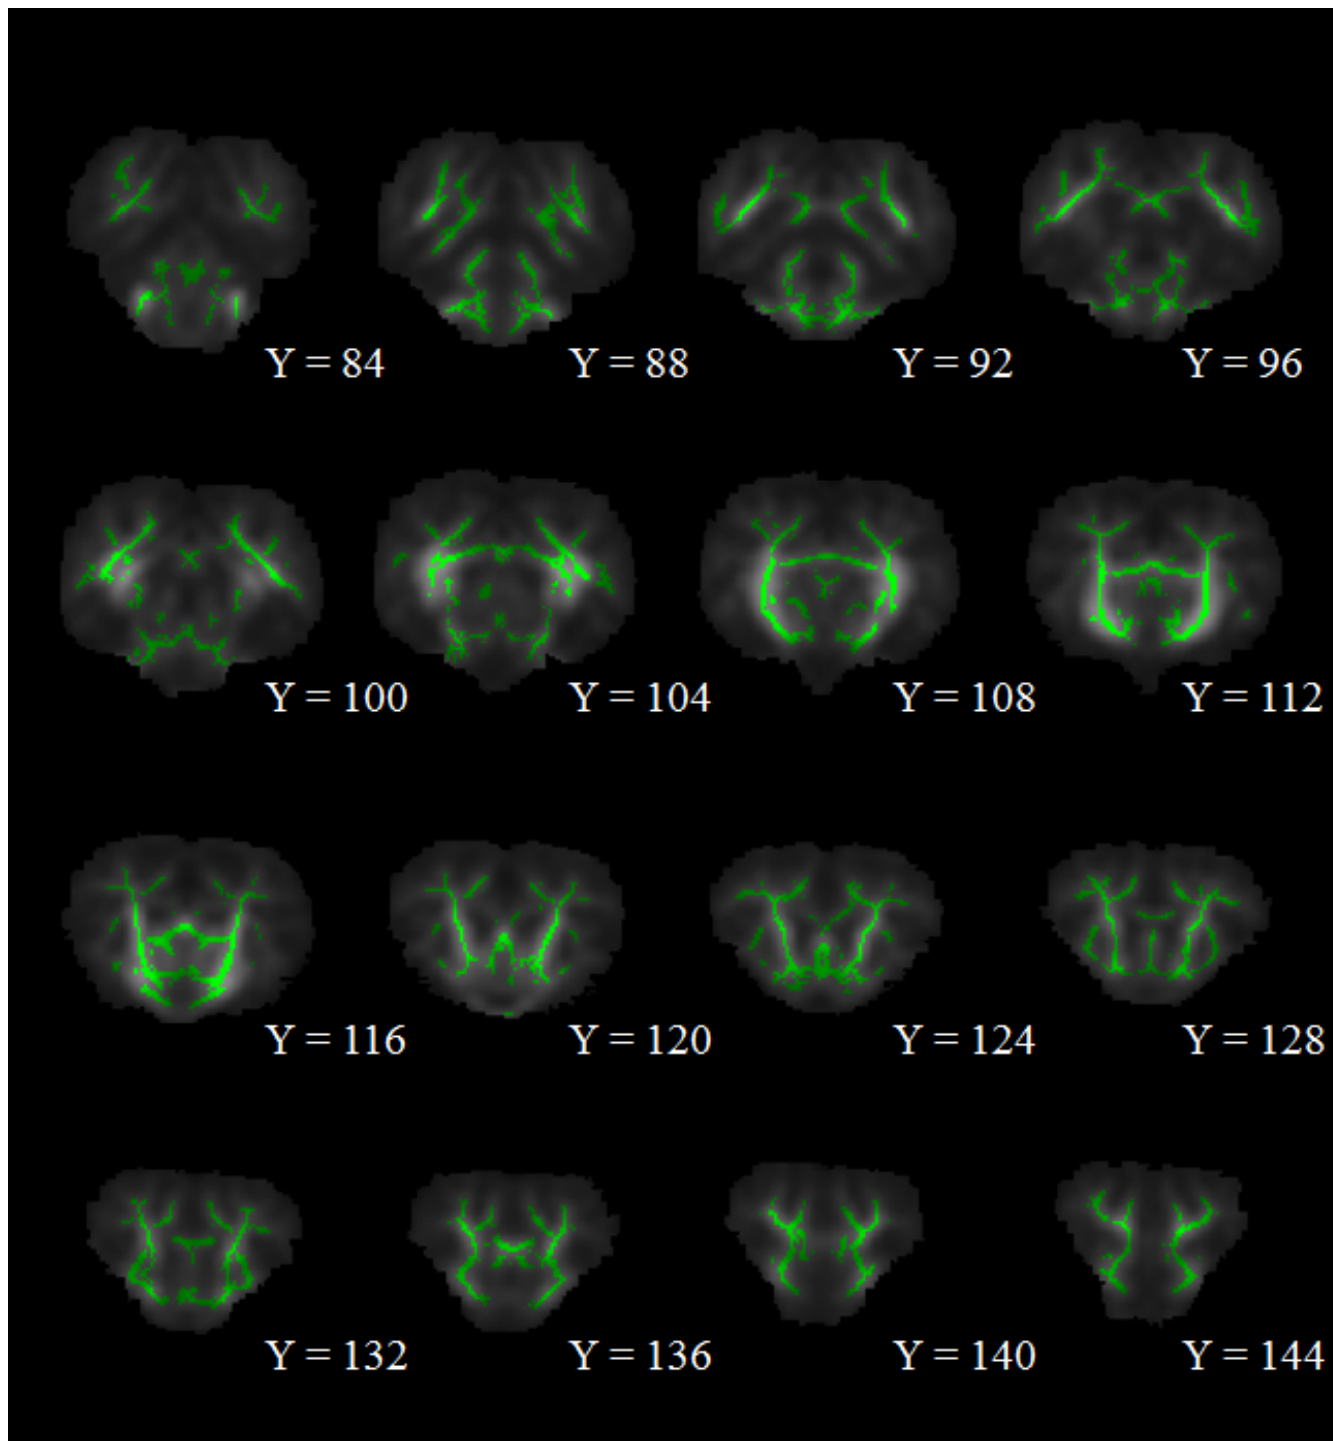

**Supplemental Figure 1.** Represented in green is the mean fractional anisotropy skeleton, representing the center of all common white matter tracts in pigs from this study. This skeleton was then applied to individual pig data to create distance maps for each of the diffusion measures and statistical analysis was performed on the distance maps generated in the TBSS analysis. Individual assessment of prenatal and postnatal choline status indicated no statistical differences ( $P > 0.05$ ) in diffusion values along the white matter tracts pictured in green.
